# Supplementary material for: Stable and Efficient Photoinduced Charge Transfer of MnFe2O4/Polyaniline Photoelectrode in Highly Acidic Solution
Source: MDPI journal article supplement (doi:10.3390/colloids6010001), 2021-12-22
Supplement: s1 [file s1]

Archive with 1 entries (1 files):
- colloids-1472936-supplementary.pdf
