# Supplementary material for: Stable and Efficient Photoinduced Charge Transfer of MnFe2O4/Polyaniline Photoelectrode in Highly Acidic Solution
Source: MDPI journal article supplement (doi:10.3390/colloids6010001), 2021-12-22
Supplement: s1 [file s1 › colloids-1472936-supplementary.pdf]

# **Stable and efficient photoinduced charge transfer of MnFe<sub>2</sub>O<sub>4</sub>/Polyaniline photoelectrode in highly acidic solution**

**Mohammed Alsultan<sup>a</sup>, Shaymaa Al-Rubaye<sup>b</sup> Amar Al-Keisy<sup>c</sup>, Gerhard F. Swiegers<sup>d</sup>,  
Intisar Ghanim Taha<sup>a</sup>**

<sup>a</sup>Department of Science, Basic Education, University of Mosul, Mosul 41002, Iraq

\*Mohamadfkaleel@uomosul.edu.iq

<sup>b</sup>Department of Physics, College of Education for Pure Science, University of Babylon, Babylon, Iraq

<sup>c</sup>Nanotechnology and Advanced Materials Research Center, University of Technology, Baghdad 10066, Iraq

<sup>d</sup>ARC Centre of Excellence for Electromaterials Science, University of Wollongong, Wollongong, NSW 2522, Australia

## **Experiment part**

Hydrothermal method is must common method to prepare nanostructure materials such as nanowire, spherical nanoparticles, nanoflower and more. Such method is highly uniform morphology and single crystals compared with other wet chemical method such as ion-exchange precipitation method. The growth start when small nucleus in water solution start self-assembly and became solid. The process is normally carried out in an apparatus consisting of a steel pressure vessel called autoclave<sup>1</sup>.

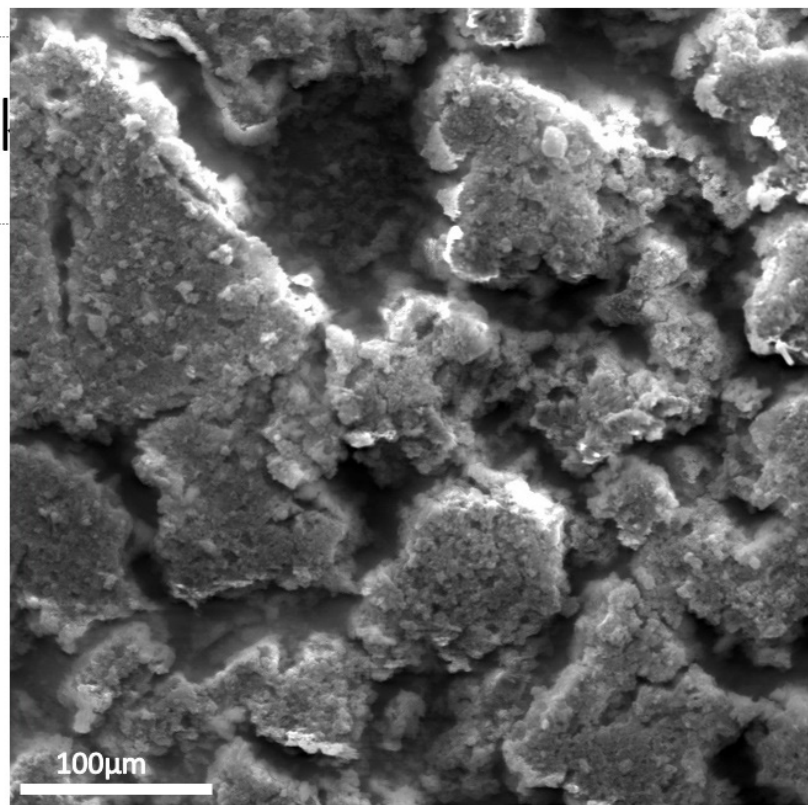

**Figure S1.** SEM image shows a further ratio of  $\text{Mn}_2\text{Fe}_2\text{O}_4/\text{PANi}$  causes unstable and rough

1. Feng, S. H.; Li, G. H., Chapter 4 - Hydrothermal and Solvothermal Syntheses. In *Modern Inorganic Synthetic Chemistry (Second Edition)*, Xu, R.; Xu, Y., Eds. Elsevier: Amsterdam, 2017; pp 73-104.
